# Supplementary material
Source: PubMed Central journal article supplement (PMC6336493)
Supplement: NIHMS1514368-supplement-1.pdf [file NIHMS1514368-supplement-1.pdf]

**Supplementary table 1. Characteristics of 674 nasopharyngeal carcinoma cases and 690 controls**

| <b>Characteristics</b>                                             | <b>Cases<br/>N=674<br/>No (%)</b> | <b>Controls<br/>N=690<br/>No (%)</b> | <b>P<sup>a</sup></b> |
|--------------------------------------------------------------------|-----------------------------------|--------------------------------------|----------------------|
| <b>Residential area</b>                                            |                                   |                                      | <i>0.820</i>         |
| Zhaoqing                                                           | 346 (51.3)                        | 362 (52.5)                           |                      |
| Wuzhou                                                             | 184 (27.3)                        | 178 (25.8)                           |                      |
| Guiping/Pingnan                                                    | 144 (21.4)                        | 150 (21.7)                           |                      |
| <b>Age at diagnosis/interview, year</b>                            |                                   |                                      | <i>0.381</i>         |
| 20-29                                                              | 34 (5.0)                          | 33 (4.8)                             |                      |
| 30-39                                                              | 116 (17.2)                        | 106 (15.4)                           |                      |
| 40-49                                                              | 259 (38.4)                        | 255 (37.0)                           |                      |
| 50-59                                                              | 164 (24.3)                        | 165 (24.0)                           |                      |
| 60-75                                                              | 101 (15.0)                        | 131 (19.0)                           |                      |
| <b>Educational level, year</b>                                     |                                   |                                      | <i>0.087</i>         |
| 0                                                                  | 82 (12.2)                         | 65 (9.4)                             |                      |
| 1-6                                                                | 324 (48.1)                        | 315 (45.9)                           |                      |
| 7-9                                                                | 192 (28.5)                        | 204 (29.6)                           |                      |
| ≥10                                                                | 76 (11.3)                         | 104 (15.1)                           |                      |
| <b>Current housing type</b>                                        |                                   |                                      | <i>&lt;0.001</i>     |
| Building (concrete structure)                                      | 474 (70.4)                        | 573 (83.0)                           |                      |
| Cottage (clay brick structure) or boat                             | 199 (29.6)                        | 117 (17.0)                           |                      |
| Missing                                                            | 1                                 | 0                                    |                      |
| <b>Current occupation</b>                                          |                                   |                                      | <i>0.059</i>         |
| Unemployed                                                         | 52 (7.7)                          | 68 (9.9)                             |                      |
| Farmer                                                             | 315 (46.7)                        | 333 (48.4)                           |                      |
| Blue collar                                                        | 178 (26.4)                        | 142 (20.6)                           |                      |
| White collar                                                       | 72 (10.7)                         | 92 (13.3)                            |                      |
| Other/unknown                                                      | 57 (8.5)                          | 54 (7.8)                             |                      |
| <b>Cigarette smoking</b>                                           |                                   |                                      | <i>0.423</i>         |
| Never                                                              | 664 (98.7)                        | 677 (98.1)                           |                      |
| Ever                                                               | 9 (1.3)                           | 13 (1.9)                             |                      |
| Missing                                                            | 1                                 | 0                                    |                      |
| <b>Current tea drinking</b>                                        |                                   |                                      | <i>0.034</i>         |
| No                                                                 | 575 (85.7)                        | 561 (81.4)                           |                      |
| Yes                                                                | 96 (14.3)                         | 128 (18.6)                           |                      |
| Missing                                                            | 3                                 | 1                                    |                      |
| <b>Salt-preserved fish consumption in 2000 to 2002</b>             |                                   |                                      | <i>0.793</i>         |
| ≤Yearly                                                            | 506 (75.2)                        | 523 (75.8)                           |                      |
| ≥Monthly                                                           | 167 (24.8)                        | 167 (24.2)                           |                      |
| Missing                                                            | 0                                 | 1                                    |                      |
| <b>Body mass index at age 20 (kg/m<sup>2</sup>)</b>                |                                   |                                      | <i>0.024</i>         |
| <18.5                                                              | 120 (17.8)                        | 162 (23.5)                           |                      |
| 18.5–22.9                                                          | 450 (66.9)                        | 441 (63.9)                           |                      |
| ≥23.0                                                              | 103 (15.3)                        | 87 (12.6)                            |                      |
| Missing                                                            | 0                                 | 1                                    |                      |
| <b>Nasopharyngeal carcinoma cases among first-degree relatives</b> |                                   |                                      | <i>&lt;0.001</i>     |
| No                                                                 | 588 (87.5)                        | 655 (94.9)                           |                      |
| Yes                                                                | 71 (10.6)                         | 20 (2.9)                             |                      |
| Unknown                                                            | 13 (1.9)                          | 15 (2.2)                             |                      |

|         |   |   |
|---------|---|---|
| Missing | 2 | 0 |
|---------|---|---|

---

<sup>a</sup> *P* values were determined using chi-squared test.
